# Supplementary material for: RNA-Induced Conformational Switching and Clustering of G3BP Drive Stress Granule Assembly by Condensation
Source: PubMed Central journal article supplement — Cell. 2020 Apr 16;181(2):346–361.e17. doi: 10.1016/j.cell.2020.03.049 (PMC7181197; doi:10.1016/j.cell.2020.03.049), 2020-04-16
Supplement: mmc1.pdf [file mmc1.pdf]

**Cell, Volume 181**

## **Supplemental Information**

### **RNA-Induced Conformational Switching**

### **and Clustering of G3BP Drive**

### **Stress Granule Assembly by Condensation**

**Jordina Guillén-Boixet, Andrii Kopach, Alex S. Holehouse, Sina Wittmann, Marcus Jahnel, Raimund Schlüßler, Kyoohyun Kim, Irmela R.E.A. Trussina, Jie Wang, Daniel Mateju, Ina Poser, Shovamayee Maharana, Martine Ruer-Gruß, Doris Richter, Xiaojie Zhang, Young-Tae Chang, Jochen Guck, Alf Honigmann, Julia Mahamid, Anthony A. Hyman, Rohit V. Pappu, Simon Alberti, and Titus M. Franzmann**

## Supplementary tables

**Table S1:** Summary of the biophysical characterization of G3BP1(WT) and variants. Related to **Figures 2 and 4**.

| Variant     | Fluorescence Correlation Spectroscopy |          | Static Light Scattering |           | Dynamic Light Scattering |          | Analytical Size Exclusion Chromatography | Oligomerization |
|-------------|---------------------------------------|----------|-------------------------|-----------|--------------------------|----------|------------------------------------------|-----------------|
|             | Mean rH (nm)                          | +/- (nm) | MW (kDa)                | +/- (kDa) | Mean rH (nm)             | +/- (nm) | Retention Time (min)                     |                 |
| WT          | 5.90                                  | 0.29     | 158                     | 1         | 6.45                     | 1.25     | 10.2                                     | Dimer           |
| ΔNTF2       | 3.96                                  | 0.21     | 70                      | 1         | 4.55                     | 1.38     | 11.7                                     | Monomer         |
| ΔRG         | 6.72                                  | 0.40     | 162                     | 1         | 7.41                     | 1.44     | 10.1                                     | Dimer           |
| ΔE1         | 6.28                                  | 0.37     | 172                     | 1         | n.d.                     | -        | 10.4                                     | Dimer           |
| ΔE2         | 6.16                                  | 0.33     | 163                     | 2         | n.d.                     | -        | 10.9                                     | Dimer           |
| ΔE1ΔE2      | n.d.                                  | -        | 220                     | 5         | n.d.                     | -        | n.d.                                     | Dimer           |
| S149A       | 6.16                                  | 0.32     | 166                     | 1         | n.d.                     | -        | 10.3                                     | Dimer           |
| S149A S232A | 6.17                                  | 0.31     | 188                     | -         | n.d.                     | -        | 10.4                                     | Dimer           |
| S149E       | n.d.                                  | -        | 166                     | 1         | n.d.                     | -        | 10.3                                     | Dimer           |

**Table S2:** Summary of the plasmids generated for this paper. Related to **STAR Methods**.

| Protein purification                                           |          |                     |            |                                                                                                                                                              |                                        |
|----------------------------------------------------------------|----------|---------------------|------------|--------------------------------------------------------------------------------------------------------------------------------------------------------------|----------------------------------------|
| Plasmid / ID                                                   | Gene     | N-term tag          | C-term tag | Mutation                                                                                                                                                     | Comments                               |
| pOCC189-G3BP1(WT)<br>L-515                                     | hG3BP1   | HIS-<br>monoGFP     | MBP        | N/A                                                                                                                                                          | Codon<br>optimised for<br>insect cells |
| pOCC189-<br>G3BP1( $\Delta$ NTF2)<br>L-546                     | hG3BP1   | HIS-<br>monoGFP     | MBP        | Deletion 1-133                                                                                                                                               | Codon<br>optimised for<br>insect cells |
| pOCC189-G3BP1( $\Delta$ RG)<br>TH0999                          | hG3BP1   | HIS-<br>monoGFP     | MBP        | Deletion 425-466                                                                                                                                             | Codon<br>optimised for<br>insect cells |
| pOCC189-<br>G3BP1(S149A)<br>L-548                              | hG3BP1   | HIS-<br>monoGFP     | MBP        | Substitution Ser to<br>Ala at position 149                                                                                                                   | Codon<br>optimised for<br>insect cells |
| pOCC189-<br>G3BP1(S149E)<br>L-549                              | hG3BP1   | HIS-<br>monoGFP     | MBP        | Substitution Ser to<br>Glu at position 149                                                                                                                   | Codon<br>optimised for<br>insect cells |
| pOCC189-<br>G3BP1(S149A/S232A)<br>L-686                        | hG3BP1   | HIS-<br>monoGFP     | MBP        | Substitution Ser to<br>Ala at positions<br>149 and 232                                                                                                       | Codon<br>optimised for<br>insect cells |
| pOCC189-G3BP1( $\Delta$ E1)<br>L-663                           | hG3BP1   | HIS-<br>monoGFP     | MBP        | Deletion 144-158<br>(insertion of Ser in<br>the deleted region)                                                                                              | Codon<br>optimised for<br>insect cells |
| pOCC189-G3BP1( $\Delta$ E2)<br>L-664                           | hG3BP1   | HIS-<br>monoGFP     | MBP        | Deletion 182-226<br>(insertion of Ala-<br>Ser in the deleted<br>region)                                                                                      | Codon<br>optimised for<br>insect cells |
| pOCC189-<br>G3BP1( $\Delta$ E1 $\Delta$ E2)<br>L-667           | hG3BP1   | HIS-<br>monoGFP     | MBP        | Deletion 144-158<br>(insertion of Ser in<br>the deleted<br>region), combined<br>with deletion 182-<br>226 (insertion of<br>Ala-Ser in the<br>deleted region) | Codon<br>optimised for<br>insect cells |
| pOCC171-G3BP1(WT)<br>L-587                                     | hG3BP1   | HIS-MBP-<br>SNAP    | N/A        | N/A                                                                                                                                                          | Codon<br>optimised for<br>insect cells |
| pOCC254-Caprin1<br>L-772                                       | hCaprin1 | HIS-MBP-<br>mCherry | N/A        | N/A                                                                                                                                                          | Codon<br>optimised for<br>insect cells |
| pOCC189-G3BP2(WT)<br>TH1434                                    | hG3BP2a  | HIS-<br>monoGFP     | MBP        | N/A                                                                                                                                                          | Codon<br>optimised for<br>insect cells |
| Cell expression                                                |          |                     |            |                                                                                                                                                              |                                        |
| pcDNA3.1-mCherry-<br>G3BP1(WT)<br>O-3507                       | hG3BP1   | mCherry             | N/A        | N/A                                                                                                                                                          | N/A                                    |
| pcDNA3.1-mCherry-<br>G3BP1( $\Delta$ E1 $\Delta$ E2)<br>O-3510 | hG3BP1   | mCherry             | N/A        | Deletion 144-158<br>(insertion of Gly in<br>the deleted<br>region), combined<br>with deletion 182-<br>226 (insertion of<br>Thr-Ser in the<br>deleted region) | N/A                                    |
| pcDNA3.1-mCherry-<br>G3BP1( $\Delta$ RGG)<br>O-3511            | hG3BP1   | mCherry             | N/A        | Deletion 425-466                                                                                                                                             | N/A                                    |
